# Supplementary material for: The role of native point defects and donor impurities in the electrical properties of ZnSb2O4: a hybrid density-functional study
Source: Royal Society of Chemistry journal article supplement (doi:10.1039/d3cp01470c), 2023-01-01
Supplement: d3cp01470c2.pdf [file d3cp01470c2.pdf]

## **Role of native point defects and donor impurities on the electrical properties of ZnSb<sub>2</sub>O<sub>4</sub>: A hybrid density-functional study**

(Supplementary Information)

Supparat Charoenphon,<sup>1</sup> Auttasit Tubtimtae,<sup>2</sup> Isao Watanabe,<sup>3</sup> Sirichok Jungthawan,<sup>4</sup> Jiraroj T-Thienprasert,<sup>1</sup> Adisak Boonchun,<sup>1</sup> and Pakpoom Reunchan<sup>1\*</sup>

<sup>1</sup>*Department of Physics, Faculty of Science, Kasetsart University, Bangkok 10900, Thailand*

<sup>2</sup>*Division of Physics, Department of Physical and Material Sciences, Faculty of Liberal Arts and Science, Kasetsart University, Kamphaeng Saen Campus, Nakhon Pathom 73140, Thailand*

<sup>3</sup>*Advanced Meson Science Laboratory, Nishina Center for Accelerator-Based Science, RIKEN, 2-1 Hirosawa, Wako 351-0198, Japan*

<sup>4</sup>*School of Physics, Institute of Science, Suranaree University of Technology, Nakhon Ratchasima, Thailand 3000*

### A. Crystal structure and atomic coordinates of ZnSb<sub>2</sub>O<sub>4</sub>

POSCAR files for the 28-atom primitive cell and 56-atom supercell of ZnSb<sub>2</sub>O<sub>4</sub> used in the calculations are attached as a zip file: POSCARs.zip

### B. Bader charge of ZnSb<sub>2</sub>O<sub>4</sub>, Sb<sub>2</sub>O<sub>3</sub>, and ZnO

Table S1 Bader charge analyses on ZnSb<sub>2</sub>O<sub>4</sub>, Sb<sub>2</sub>O<sub>3</sub> and ZnO

|    | ZnSb <sub>2</sub> O <sub>4</sub> | Sb <sub>2</sub> O <sub>3</sub> | Sb <sub>2</sub> O <sub>5</sub> | ZnO    |
|----|----------------------------------|--------------------------------|--------------------------------|--------|
| Sb | +1.86e                           | +1.92e                         | +3.06e                         | -      |
| Zn | +1.47e                           | -                              | -                              | +1.06e |
| O1 | -1.27e                           | -1.31e                         | -1.19e                         | -1.06e |
| O2 | -1.32e                           | -1.26e                         | -1.22e                         | -      |
| O3 | -                                | -                              | -1.24e                         | -      |

### C. Formation energy and transition levels of selected defects using 56- and 224-atom supercells.

**Table S2** Formation energy of predominant defects at the VBM calculated using 56- and 224-atom supercells.

| Defect           | $q$ | Supercell 56 atoms |        | Supercell 224 atoms |        |
|------------------|-----|--------------------|--------|---------------------|--------|
|                  |     | O-rich             | O-poor | O-rich              | O-poor |
| $V_{\text{O}}$   | 2+  | 2.44               | 1.68   | 2.54                | 1.78   |
|                  | 1+  | 0.09               | -0.67  | 0.19                | -0.57  |
|                  | 0   | -2.57              | -3.33  | -2.67               | -3.43  |
| $Zn_{\text{Sb}}$ | 1-  | 3.41               | 3.78   | 3.56                | 3.94   |
|                  | 0   | 2.17               | 2.55   | 2.31                | 2.69   |
| $Ga_{\text{Zn}}$ | 0   | 2.19               | 1.82   | 2.35                | 1.97   |
|                  | 1+  | -2.15              | -2.53  | -2.00               | -2.38  |

**Table S3** Calculated transition level of the predominant defect using 56- and 224-atom supercells. All values are referenced to the VBM.

| Defect           | Supercell 56 atoms |                   | Supercell 224 atoms |                   |
|------------------|--------------------|-------------------|---------------------|-------------------|
|                  | $q, q'$            | $\epsilon(q, q')$ | $q, q'$             | $\epsilon(q, q')$ |
| $V_{\text{O}}$   | 2+/0               | 2.50              | 2+/0                | 2.61              |
| $Zn_{\text{Sb}}$ | 0/-                | 1.24              | 0/-                 | 1.25              |
| $Ga_{\text{Zn}}$ | +/0                | 4.34              | +/0                 | 4.35              |

#### D. Local atomic structure of intrinsic defects

##### Vacancies

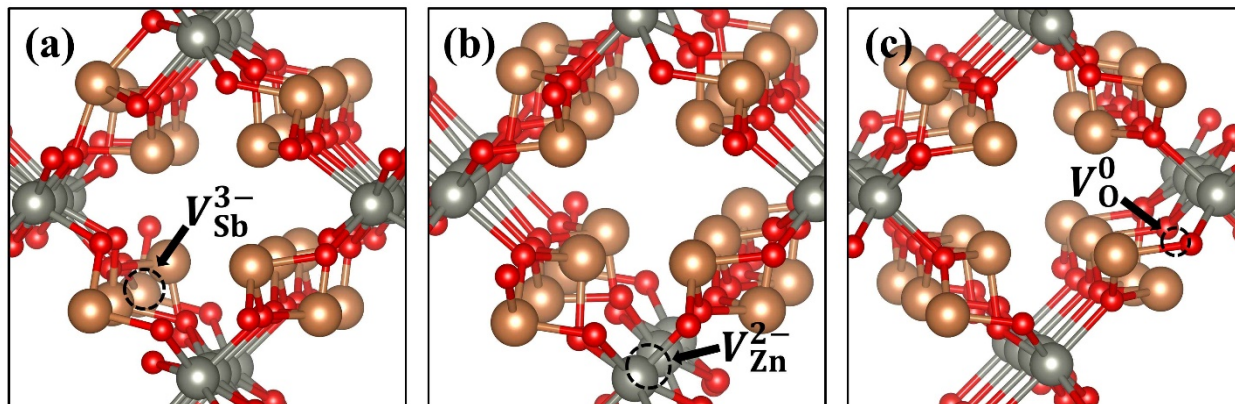

**Figure S1** Local atomic structure of vacancy defects in their stable charge state at the pinned Fermi level; (a)  $V_{\text{Sb}}^{3-}$ , (b)  $V_{\text{Zn}}^{2-}$  and (c)  $V_{\text{O}}^0$ . The small red spheres are the O atoms; the large grey spheres and large copper spheres are Zn and Sb, respectively.

### Interstitials

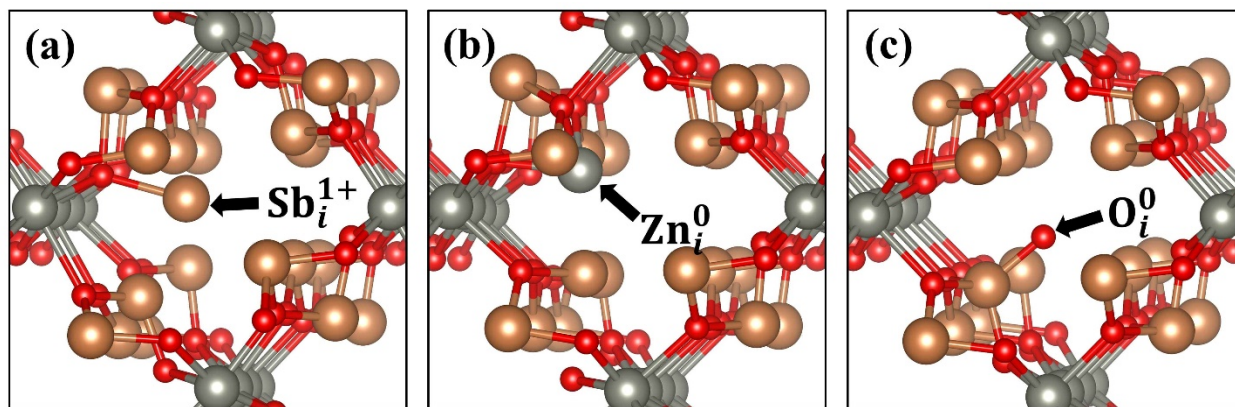

**Figure S2** Local atomic geometry of interstitial defects in their stable charge state at the pinned Fermi level; (a)  $\text{Sb}_i^{1+}$ , (b)  $\text{Zn}_i^0$  and (c)  $\text{O}_i^0$ . The small red spheres are the O atoms; the large grey spheres and large copper spheres are Zn and Sb, respectively.

### Antisites

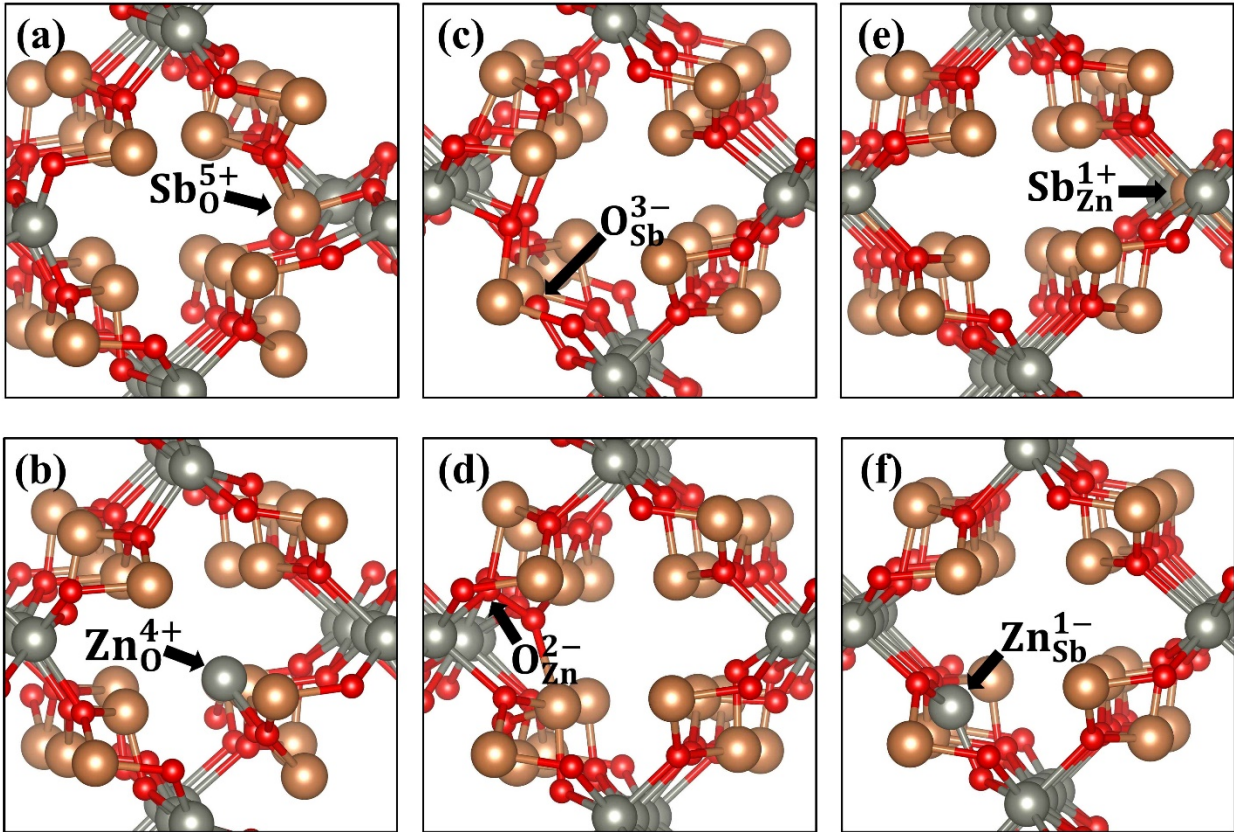

**Figure S3** Local atomic structure of antisite defects in their stable charge state at the pinned Fermi level; (a)  $\text{Sb}_0^{5+}$ , (b)  $\text{Zn}_0^{4+}$ , (c)  $\text{O}_{\text{Sb}}^{3-}$ , (d)  $\text{O}_{\text{Zn}}^{2-}$ , (e)  $\text{Sb}_{\text{Zn}}^{1+}$  and (f)  $\text{Zn}_{\text{Sb}}^{1-}$ . The small red spheres are the O atoms; the large grey spheres and large copper spheres are Zn and Sb, respectively.

## E. Local atomic structure of Al, In, Ga, and F impurities

### In impurities

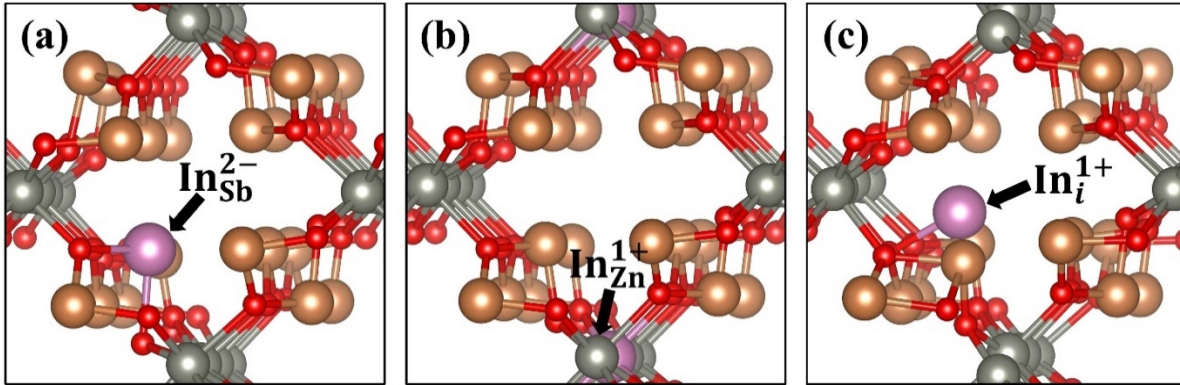

**Figure S4** Local atomic geometry of indium (In) impurities in their stable charge state at the pinned Fermi level; (a)  $\text{In}_{\text{Sb}}^{2-}$ , (b)  $\text{In}_{\text{Zn}}^{1+}$  and (c)  $\text{In}_i^{1+}$ . The small red spheres are the O atoms; the large grey spheres, large copper spheres and large purple spheres are Zn, Sb, and In, respectively.

### Al impurities

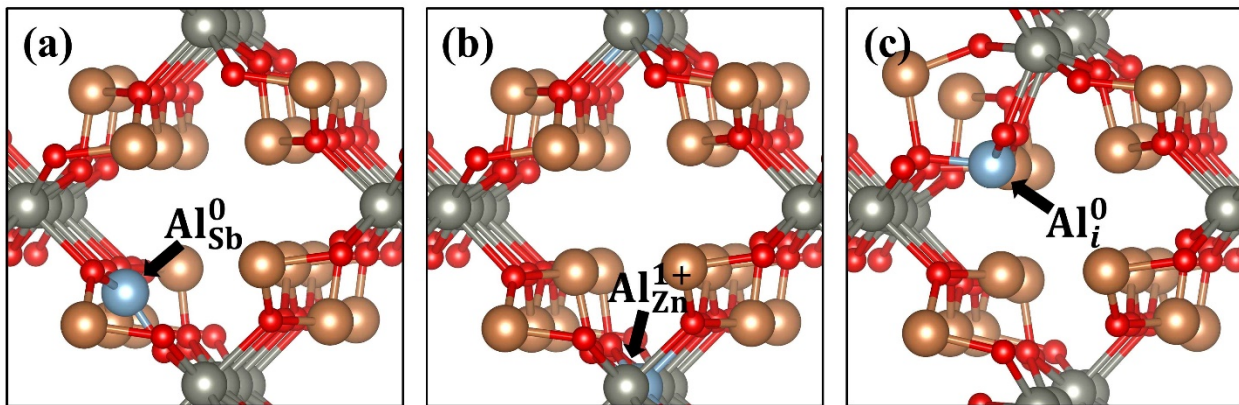

**Figure S5** Local atomic geometry of aluminum (Al) impurities in their stable charge state at the pinned Fermi level; (a)  $\text{Al}_{\text{Sb}}^0$ , (b)  $\text{Al}_{\text{Zn}}^{1+}$ , and (c)  $\text{Al}_i^0$ . The small red spheres are the O atoms; the large grey spheres, large copper spheres and large blue spheres are Zn, Sb and Al, respectively.

### Ga impurities

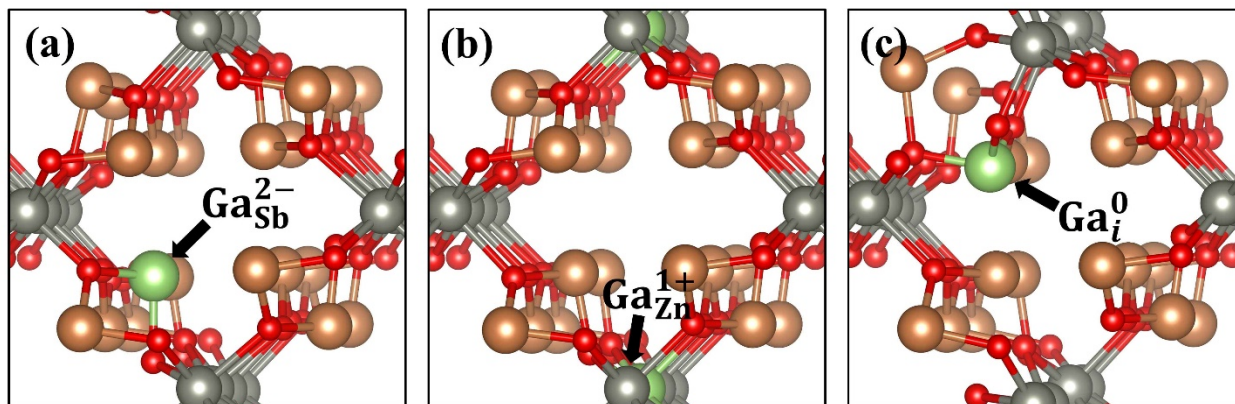

**Figure S6** Local atomic geometry of gallium (Ga) impurities in  $\text{ZnSb}_2\text{O}_4$  as shown (a)  $\text{Ga}_{\text{Sb}}^{2-}$ , (b)  $\text{Ga}_{\text{Zn}}^{1+}$  and (c)  $\text{Ga}_i^0$ . The small red spheres are the O atoms; the large grey spheres, large copper spheres and large green spheres are Zn, Sb and Ga, respectively.

### F impurities

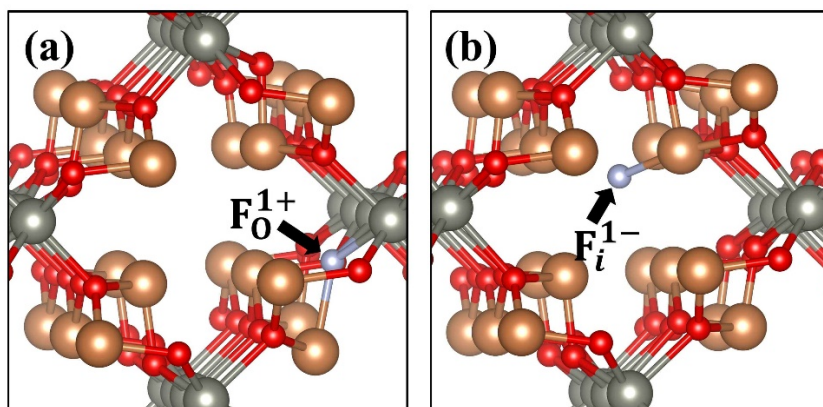

**Figure S7** Local atomic geometry of fluorine (F) impurities in their stable charge state at the pinned Fermi level (a)  $\text{F}_\text{O}^{1+}$  and (b)  $\text{F}_i^{1-}$ . The small red spheres are the O atoms; the large grey spheres, large copper spheres and small light purple spheres are Zn, Sb and F respectively.
